# Supplementary material
Source: MDPI journal article supplement (https://www.mdpi.com/1999-4907/11/8/826)
Supplement: s1 [file s1]

## Supplementary Data

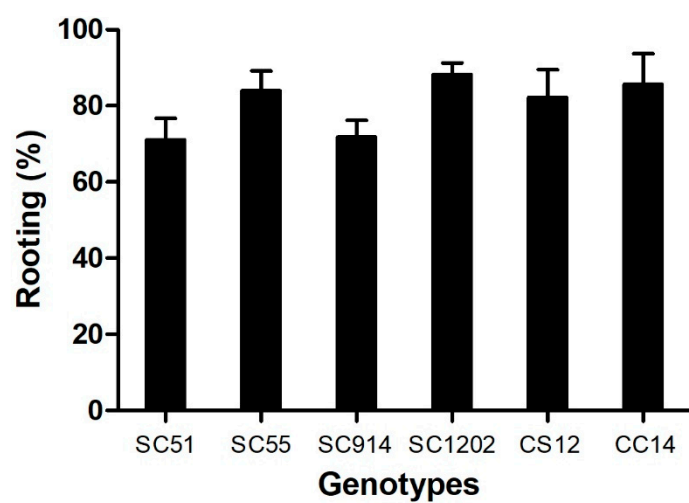

**Supplementary Figure S1.** Rooting percentages of *Castanea sativa* × *C. crenata* hybrids (SC51, SC55, SC914, SC1202), *C. sativa* (CS12; Origin: TRAGSA, Spain) and *C. crenata* (CC14; Origin: TRAGSA, Spain) after rooting with adapted MMN liquid medium. Data correspond to the means of 3 rooting events ( $n = 40$  to 140 per rooting event). Bars correspond to standard error.

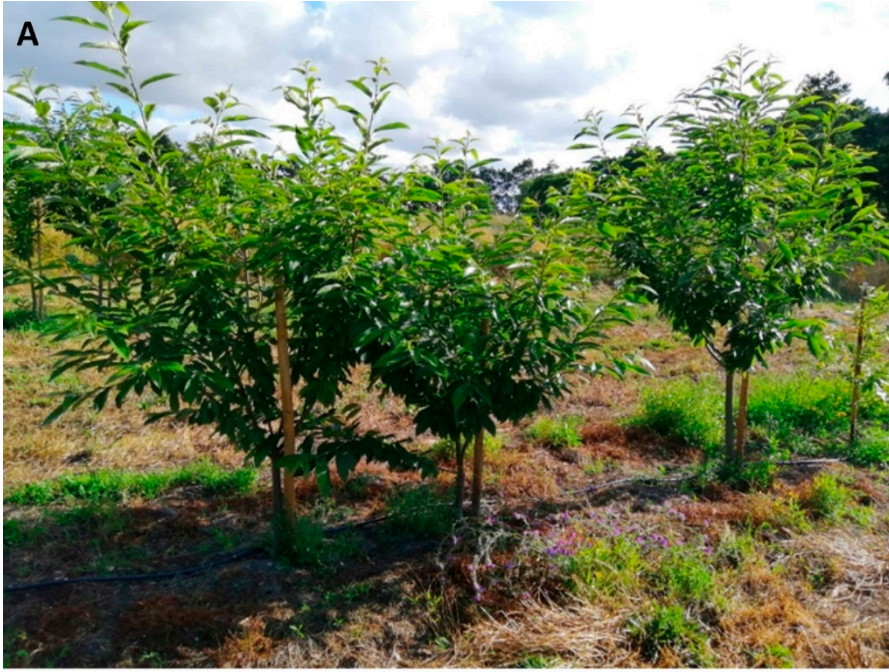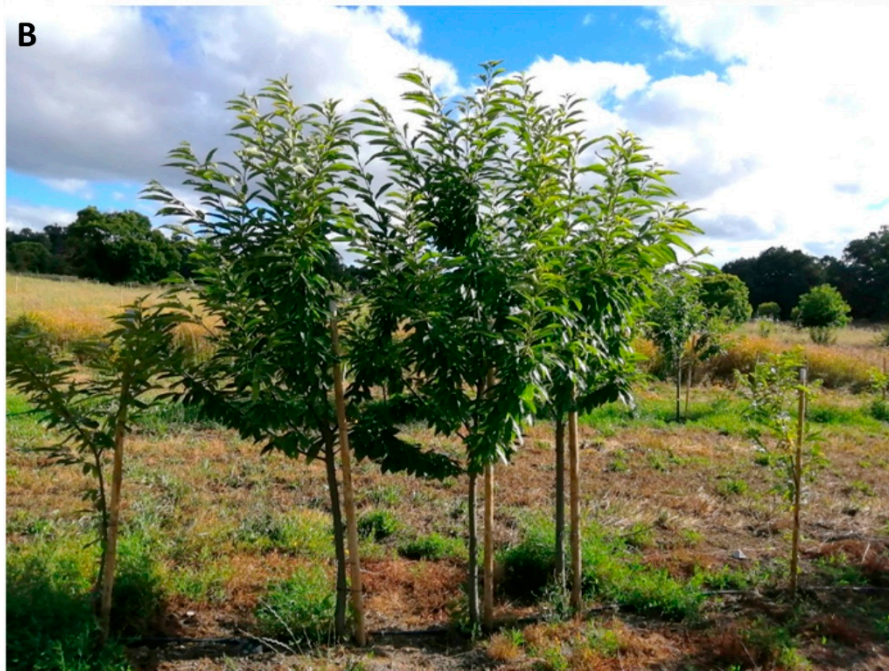

**Supplementary Figure S2.** Chestnut hybrids of SC1202 (A) and SC55 (B) genotypes (*Castanea sativa* × *C. crenata*) after 2 years in the field.
